# Supplementary material
Source: PubMed Central journal article supplement (PMC2646368)

Figure S-1

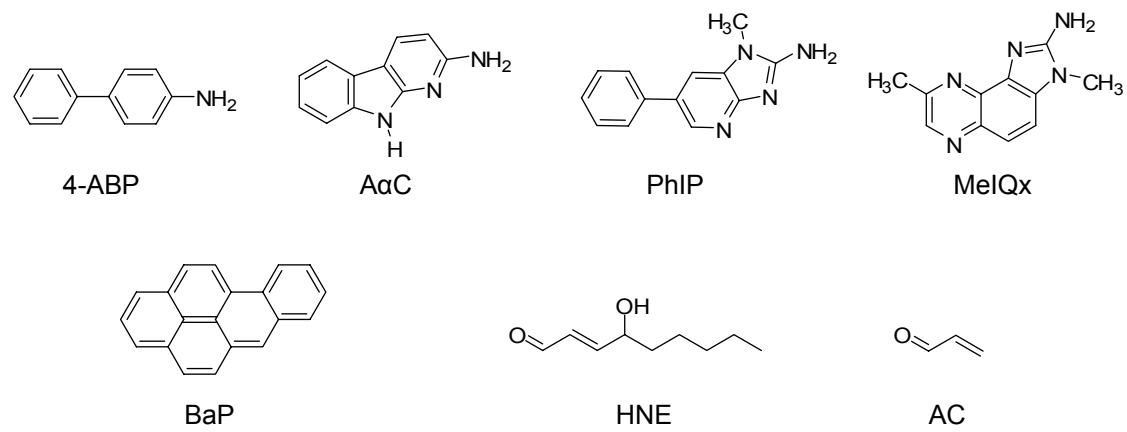

Figure S-2

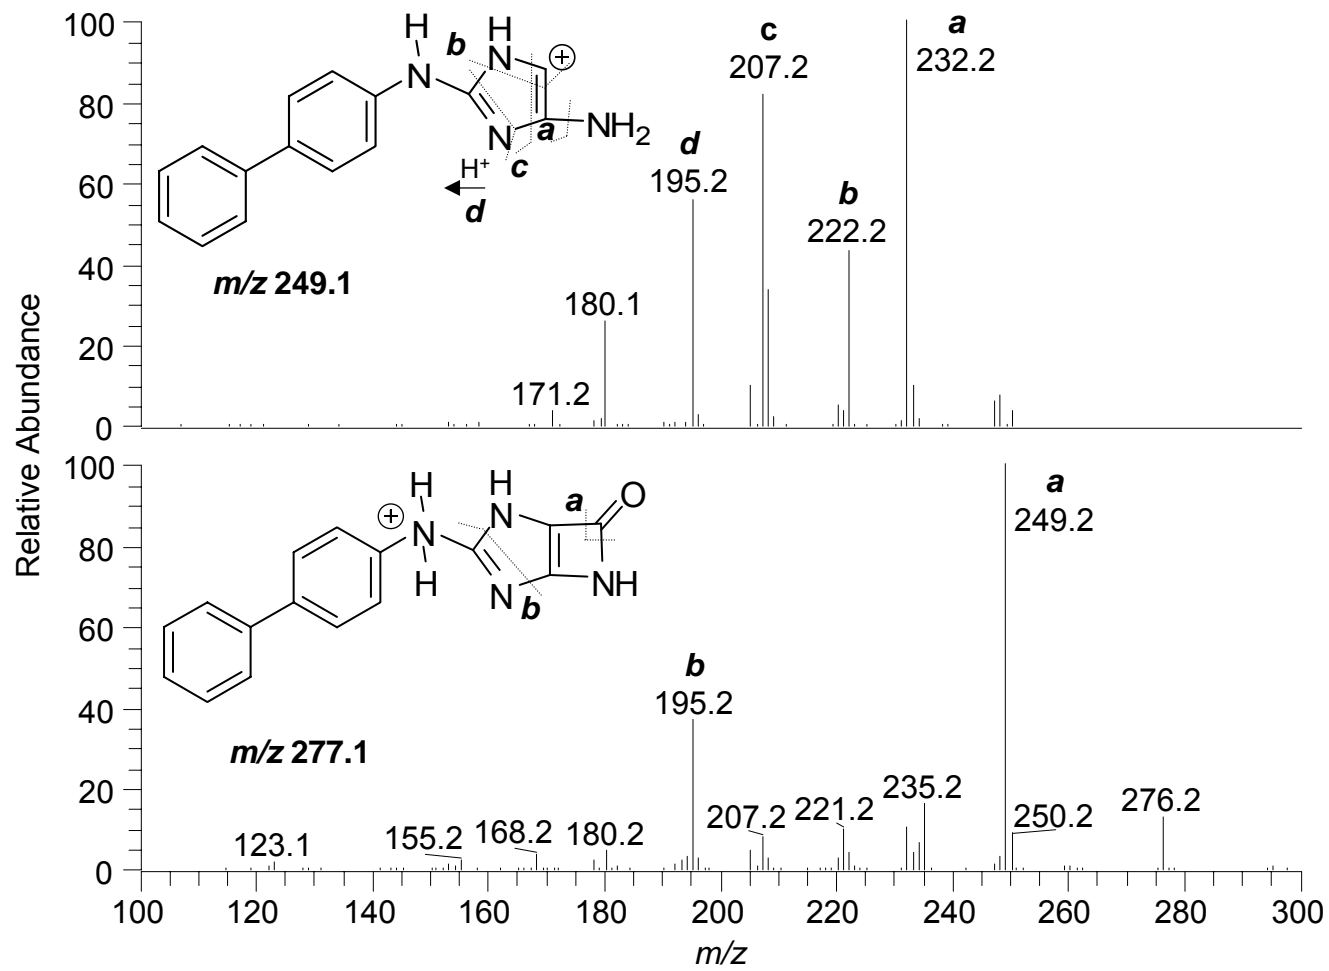

Figure S-3

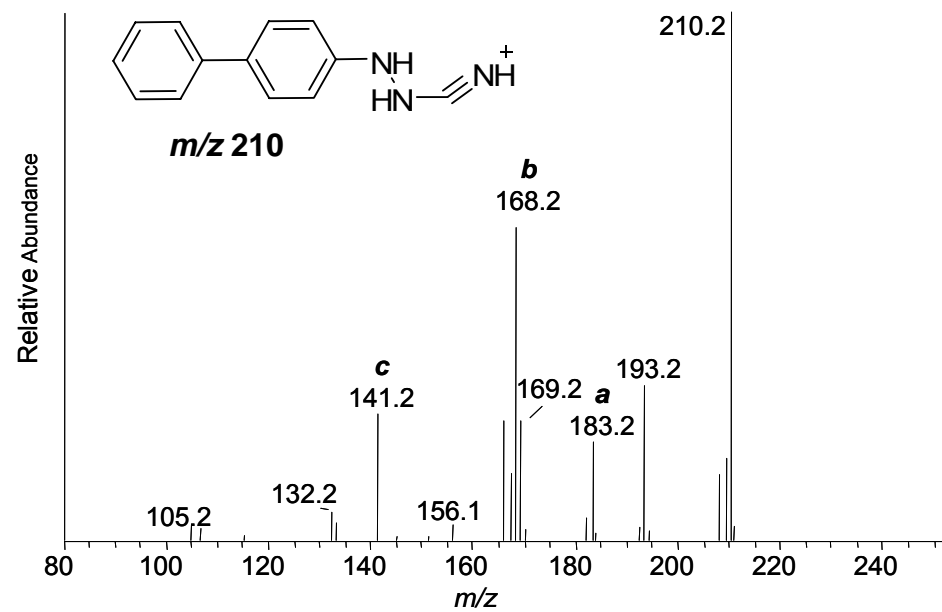

Figure S-4

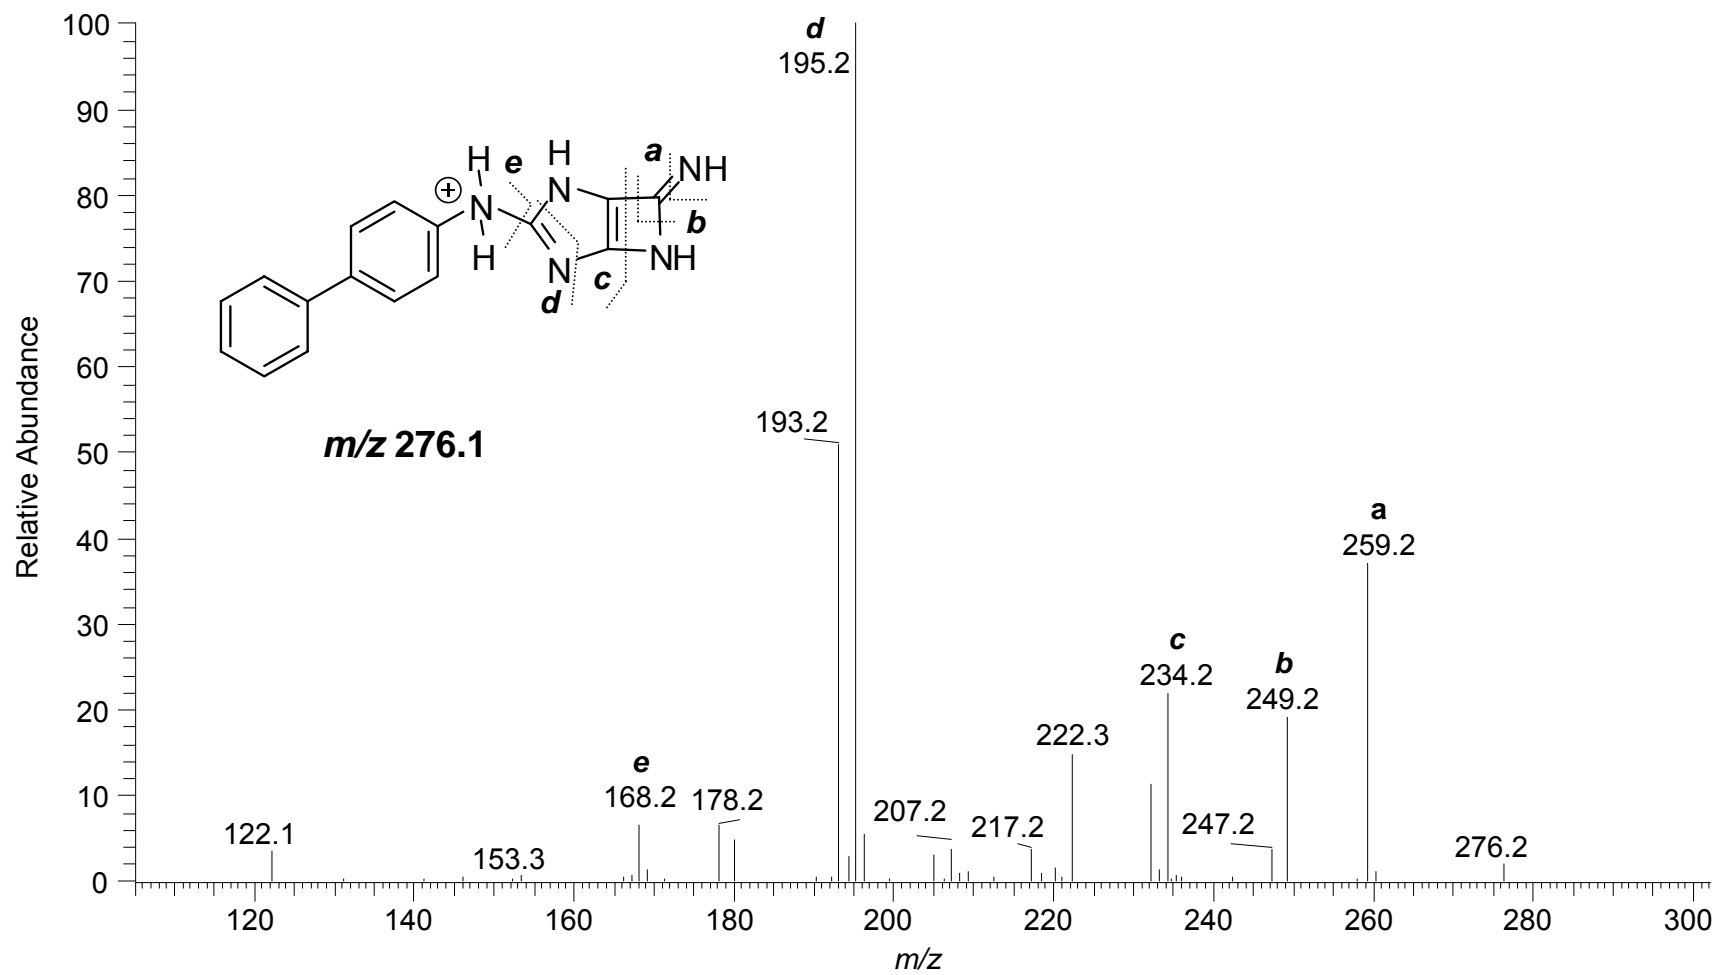

Figure S-5

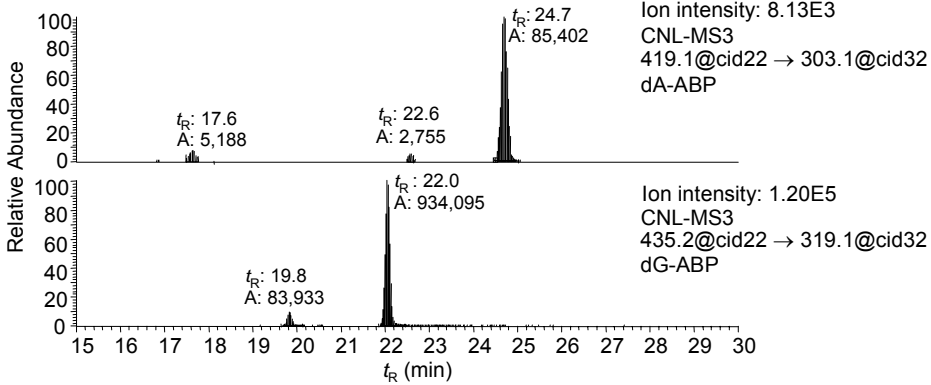

Figure S-6

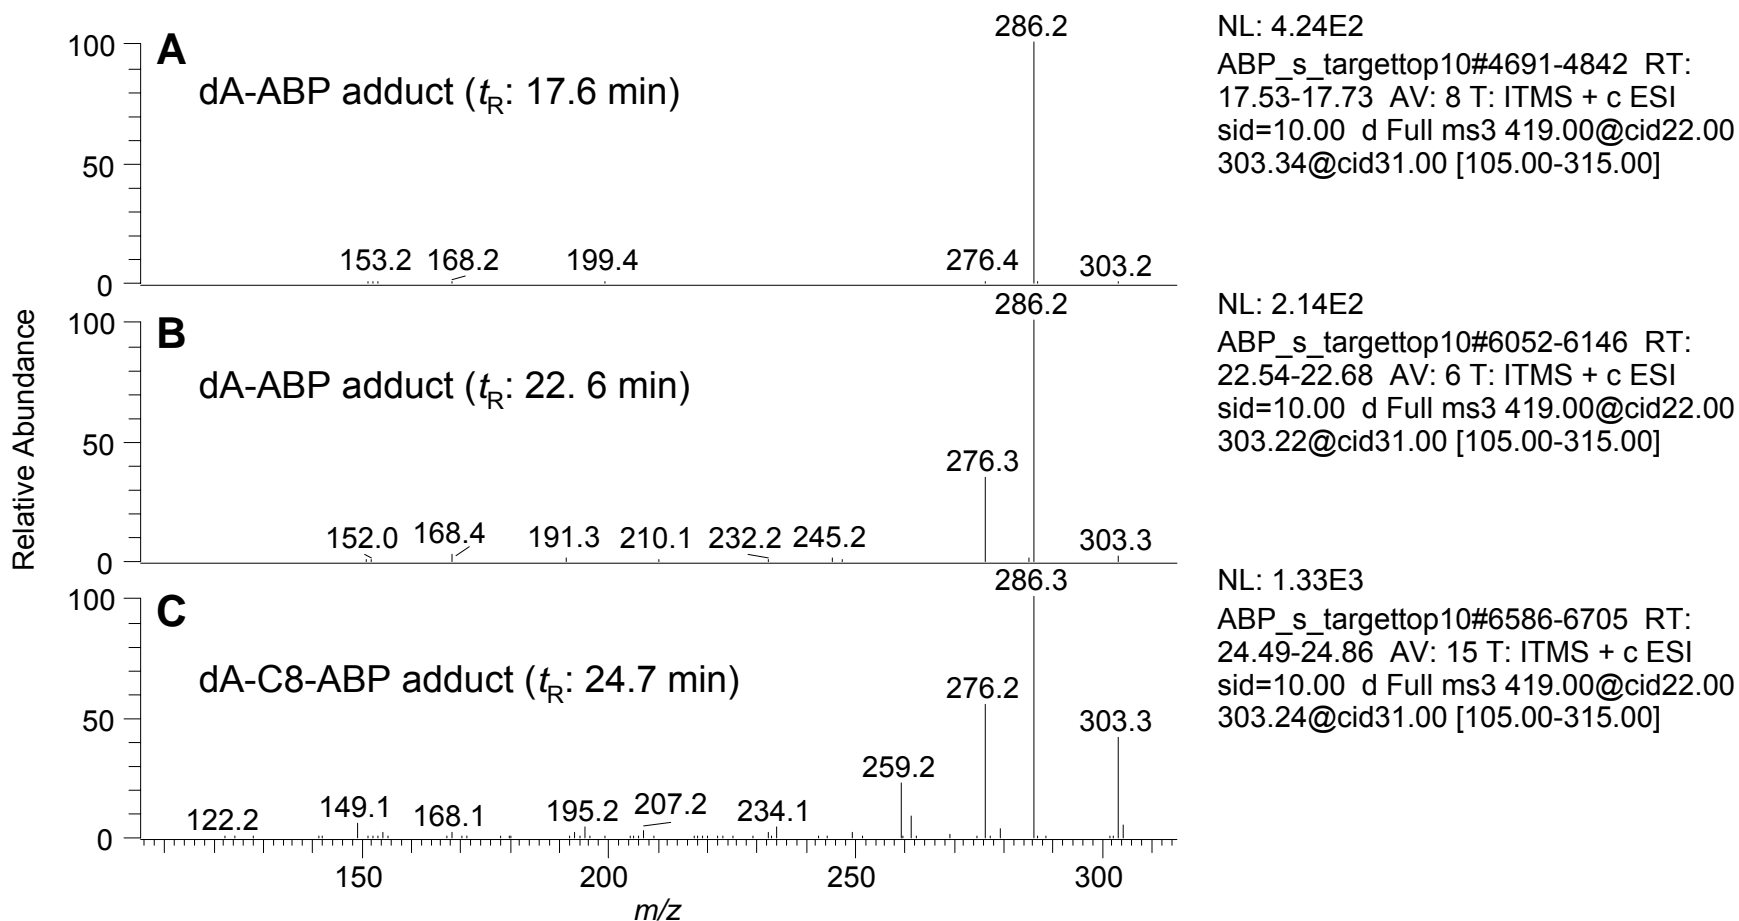

# Scheme S-I

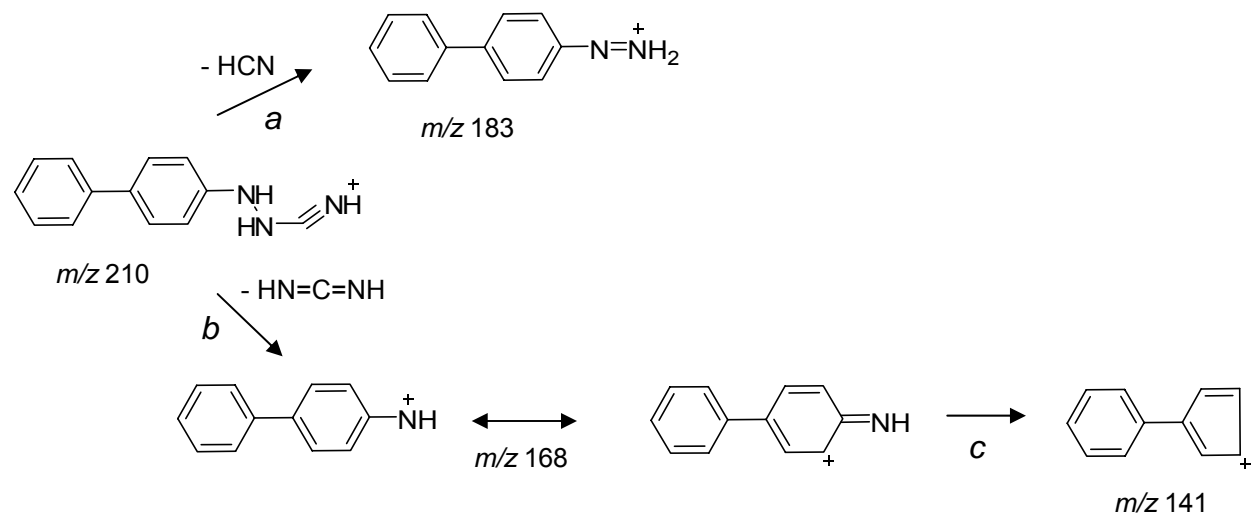

Supplement: NIHMS86732-supplement-2_si_002.pdf [file NIHMS86732-supplement-2_si_002.pdf]
